# Supplementary material for: Selenium in Proteins: Conformational Changes Induced by Se Substitution on Methionine, as Studied in Isolated Model Peptides by Optical Spectroscopy and Quantum Chemistry
Source: MDPI journal article supplement (doi:10.3390/molecules27103163), 2022-05-15
Supplement: s1 [file molecules-1716460-supplementary.pdf › molecules-1716460-supplementary.pdf]

# Selenium in proteins: Conformational changes induced by Se substitution on methionine, as studied in isolated model peptides by optical spectroscopy and quantum chemistry

Gildas Goldsztejn, Venkateswara Rao Mundlapati, Valérie Brenner, Eric Gloaguen, and Michel Mons\*

## *Supplementary Materials*

### Table of contents

Table S1 : Assignment table for the Ac-Sem-Phe-NH<sub>2</sub> compound

Table S2: Assignment table for the Ac-Met-Phe-NH<sub>2</sub> compound

Table S3 : Relevant NBO data for Ac-Sem-Phe-NH<sub>2</sub> and the intermolecular complex Se(Me)<sub>2</sub>···MMA

Table S4 : Relevant NBO data for Ac-Met-Phe-NH<sub>2</sub> and the intermolecular complex S(Me)<sub>2</sub>···MMA

Figure S1 : Comparison of the geometrical approaches of Sem and Met in relevant conformations of Ac-Sem-Phe-NH<sub>2</sub>, Ac-Met-Phe-NH<sub>2</sub> and of the intermolecular complexes S/Se(Me)<sub>2</sub>···MMA

Figure S2 : NH stretch frequency vs. population of the  $\sigma^*$ NH NBO

Table S1 : Comparison of the experimental N-H stretch frequencies of the 4 conformers of **Ac-Sem-Phe-NH<sub>2</sub>** with relevant theoretical data obtained for the lowest energy conformers of each backbone family (see Figure 2). Also given are, for each conformation: H-bond network and side chain orientations; relative enthalpies ( $\Delta H$ , 0 K) and Gibbs free energies ( $\Delta G$ , 300 K), both in kJ/mol. ; theoretical N-H stretch vibrational frequencies ( $\text{cm}^{-1}$ ) and average and maximum deviations ( $\langle \delta \rangle$  and  $\delta_{\text{max}}$  resp.) of the theoretical frequencies with respect to experimental frequencies of conformers A-D. These latter criteria can be used to guide the assignment, since typical discrepancy with experimental data is less than 20  $\text{cm}^{-1}$  for free NH or NH...OC H-bonds. The best match conformations are indicated here in red in the eight last columns.

| Experiment                                                        |                            |                              |                                             |                          |                   |                           |                          |                       |                          |                       |                          |                       |                          |                       |                          |                       |  |
|-------------------------------------------------------------------|----------------------------|------------------------------|---------------------------------------------|--------------------------|-------------------|---------------------------|--------------------------|-----------------------|--------------------------|-----------------------|--------------------------|-----------------------|--------------------------|-----------------------|--------------------------|-----------------------|--|
|                                                                   | Conformer                  |                              | NH stretch frequencies ( $\text{cm}^{-1}$ ) |                          |                   |                           |                          |                       |                          |                       |                          |                       |                          |                       |                          |                       |  |
|                                                                   | A                          |                              | 3354                                        | 3381                     | 3434              | 3520                      |                          |                       |                          |                       |                          |                       |                          |                       |                          |                       |  |
|                                                                   | D                          |                              | 3332                                        | 3389                     | 3437              | 3519                      |                          |                       |                          |                       |                          |                       |                          |                       |                          |                       |  |
|                                                                   | B                          |                              | 3272                                        | 3381                     | 3452              | 3520                      |                          |                       |                          |                       |                          |                       |                          |                       |                          |                       |  |
|                                                                   | C                          |                              | 3329                                        | 3422                     | 3440              | 3539                      |                          |                       |                          |                       |                          |                       |                          |                       |                          |                       |  |
|                                                                   |                            |                              |                                             |                          |                   |                           |                          |                       |                          |                       |                          |                       |                          |                       |                          |                       |  |
| Theory                                                            |                            |                              | NH stretch frequencies ( $\text{cm}^{-1}$ ) |                          |                   |                           |                          |                       |                          |                       |                          |                       |                          |                       |                          |                       |  |
|                                                                   | $\Delta H$ (0 K)<br>kJ/mol | $\Delta G$ (300 K)<br>kJ/mol | NH <sub>Sem</sub>                           | NH <sub>2</sub><br>symm. | NH <sub>Phe</sub> | NH <sub>2</sub><br>antis. | A                        |                       | D                        |                       | B                        |                       | C                        |                       |                          |                       |  |
|                                                                   |                            |                              |                                             |                          |                   |                           | $\langle \delta \rangle$ | $\delta_{\text{max}}$ |  |
| $6_{\text{E}}^{\delta} - \pi_{\text{E}^{+}} - 10$                 | 0.0                        | 0.0                          | 3331                                        | 3388                     | 3448              | 3527                      | 13                       | 23                    | 5                        | 11                    | 19                       | 59                    | 14                       | 34                    |                          |                       |  |
| $6_{\text{A}}^{\delta} - \pi_{\text{E}^{+}} - 10$                 | 5.3                        | 4.6                          | 3354                                        | 3393                     | 3447              | 3528                      | 8                        | 13                    | 11                       | 22                    | 27                       | 82                    | 18                       | 29                    |                          |                       |  |
|                                                                   |                            |                              |                                             |                          |                   |                           |                          |                       |                          |                       |                          |                       |                          |                       |                          |                       |  |
| $5_{\text{E}^{+}} - 7_{\text{E}^{+}}^{\delta} - 7_{\text{L}}$     | 9.4                        | 6.0                          | 3332                                        | 3373                     | 3453              | 3521                      | 12                       | 22                    | 9                        | 16                    | 18                       | 60                    | 21                       | 49                    |                          |                       |  |
| $5_{\text{E}^{+}} - 7_{\text{E}^{+}}^{\delta} - 7_{\text{L}}$     | 6.7                        | 9.0                          | 3316                                        | 3365                     | 3460              | 3520                      | 20                       | 38                    | 16                       | 24                    | 17                       | 44                    | 27                       | 57                    |                          |                       |  |
| $5_{\text{E}^{+}} - 7_{\text{A}}^{\delta} - 7_{\text{L}}$         | 13.3                       | 9.6                          | 3308                                        | 3399                     | 3459              | 3522                      | 23                       | 46                    | 15                       | 24                    | 16                       | 36                    | 20                       | 23                    |                          |                       |  |
| $5_{\text{E}^{+}} - 7_{\text{E}^{+}}^{\delta} - 7_{\text{D}}$     | 5.8                        | 8.0                          | 3315                                        | 3360                     | 3454              | 3524                      | 21                       | 39                    | 17                       | 29                    | 17                       | 43                    | 26                       | 62                    |                          |                       |  |
|                                                                   |                            |                              |                                             |                          |                   |                           |                          |                       |                          |                       |                          |                       |                          |                       |                          |                       |  |
| $5_{\text{A}} - 7_{\text{E}^{+}}^{\delta} - 7_{\text{L}}$         | 8.5                        | 9.0                          | 3277                                        | 3378                     | 3462              | 3528                      | 29                       | 77                    | 25                       | 55                    | 6                        | 10                    | 32                       | 52                    |                          |                       |  |
| $5_{\text{A}} - 7_{\text{E}^{+}}^{\delta} - 7_{\text{L}}$         | 11.4                       | 10.0                         | 3260                                        | 3374                     | 3454              | 3516                      | 31                       | 94                    | 27                       | 72                    | 6                        | 12                    | 39                       | 69                    |                          |                       |  |
| $5_{\text{A}} - 7_{\text{A}}^{\delta} - 7_{\text{L}}$             | 13.7                       | 12.4                         | 3249                                        | 3394                     | 3458              | 3520                      | 36                       | 105                   | 28                       | 83                    | 11                       | 23                    | 36                       | 80                    |                          |                       |  |
| $5_{\text{A}} - 7_{\text{E}^{+}}^{\delta} - f$                    | 14.3                       | 7.6                          | 3274                                        | 3432                     | 3447              | 3559                      | 46                       | 80                    | 38                       | 58                    | 24                       | 51                    | 23                       | 55                    |                          |                       |  |
| $5_{\text{A}} - 7_{\text{E}^{+}}^{\delta} - 7_{\text{D}}$         | 10.9                       | 14.3                         | 3267                                        | 3361                     | 3451              | 3524                      | 32                       | 87                    | 28                       | 65                    | 7                        | 20                    | 37                       | 62                    |                          |                       |  |
|                                                                   |                            |                              |                                             |                          |                   |                           |                          |                       |                          |                       |                          |                       |                          |                       |                          |                       |  |
| $5_{\text{E}^{+}} - 7_{\text{E}^{+}}^{\delta}/5_{\text{A}} - \pi$ | 12.6                       | 7.6                          | 3351                                        | 3426                     | 3444              | 3540                      | 19                       | 45                    | 21                       | 37                    | 38                       | 79                    | 8                        | 22                    |                          |                       |  |
| $5_{\text{A}} - 7_{\text{E}^{+}}^{\delta}/5_{\text{A}} - \pi$     | 16.9                       | 11.5                         | 3319                                        | 3425                     | 3442              | 3538                      | 26                       | 44                    | 18                       | 36                    | 30                       | 47                    | 4                        | 10                    |                          |                       |  |

**Table S2** : Comparison of the experimental N-H stretch frequencies of the 4 conformers of **Ac-Met-Phe-NH<sub>2</sub>** with relevant theoretical data obtained for the lowest energy conformers of each backbone family (see Figure 2). Also given are, for each conformation: H-bond network and side chain orientations; relative enthalpies ( $\Delta H$ , 0 K) and Gibbs free energies ( $\Delta G$ , 300 K), both in kJ/mol. ; theoretical N-H stretch vibrational frequencies ( $\text{cm}^{-1}$ ) and average and maximum deviations ( $\langle \delta \rangle$  and  $\delta_{\text{max}}$  resp.) of the theoretical frequencies with respect to experimental frequencies of conformers A-D. These latter criteria can be used to guide the assignment, since typical discrepancy with experimental data is less than  $20 \text{ cm}^{-1}$  for free NH or  $\text{NH} \cdots \text{OC}$  H-bonds. The best match conformations are indicated here in red in the four last columns.

| Experiment                                                    |                            |                              |                                             |                          |                   |                           |                          |                       |                          |                       |  |
|---------------------------------------------------------------|----------------------------|------------------------------|---------------------------------------------|--------------------------|-------------------|---------------------------|--------------------------|-----------------------|--------------------------|-----------------------|--|
|                                                               | Conformer                  |                              | NH stretch frequencies ( $\text{cm}^{-1}$ ) |                          |                   |                           |                          |                       |                          |                       |  |
|                                                               | <b>A</b>                   |                              | <b>3359</b>                                 | <b>3385</b>              | <b>3436</b>       | <b>3518</b>               |                          |                       |                          |                       |  |
|                                                               | <b>B</b>                   |                              | <b>3340</b>                                 | <b>3359</b>              | <b>3449</b>       | <b>3518</b>               |                          |                       |                          |                       |  |
|                                                               |                            |                              |                                             |                          |                   |                           |                          |                       |                          |                       |  |
| Theory                                                        |                            |                              |                                             |                          |                   |                           |                          |                       |                          |                       |  |
|                                                               |                            |                              | NH stretch frequencies ( $\text{cm}^{-1}$ ) |                          |                   |                           |                          |                       |                          |                       |  |
|                                                               | $\Delta H$ (0 K)<br>kJ/mol | $\Delta G$ (300 K)<br>kJ/mol | NH <sub>sem</sub>                           | NH <sub>2</sub><br>symm. | NH <sub>phe</sub> | NH <sub>2</sub><br>antis. | A                        |                       | B                        |                       |  |
|                                                               |                            |                              |                                             |                          |                   |                           | $\langle \delta \rangle$ | $\delta_{\text{max}}$ | $\langle \delta \rangle$ | $\delta_{\text{max}}$ |  |
| $6^{\delta}_{\text{a}} - \pi_{\text{g}^{+}} - 10$             | 4.3                        | 2.3                          | 3360                                        | 3391                     | 3445              | 3527                      | <b>6</b>                 | <b>9</b>              | 16                       | 32                    |  |
| $6^{\delta}_{\text{g}^{-}} - \pi_{\text{g}^{+}} - 10$         | 0.0                        | 0.0                          | 3341                                        | 3389                     | 3444              | 3527                      | <b>10</b>                | <b>18</b>             | 12                       | 30                    |  |
|                                                               |                            |                              |                                             |                          |                   |                           |                          |                       |                          |                       |  |
| $5_{\text{g}^{+}} - 7^{\delta}_{\text{g}^{-}} - 7_{\text{L}}$ | 10.0                       | 6.0                          | 3332                                        | 3375                     | 3454              | 3522                      | 15                       | 27                    | <b>8</b>                 | <b>16</b>             |  |
| $5_{\text{g}^{+}} - 7^{\delta}_{\text{g}^{+}} - 7_{\text{L}}$ | 7.6                        | 6.7                          | 3314                                        | 3369                     | 3459              | 3521                      | 22                       | 45                    | <b>12</b>                | <b>26</b>             |  |
| $5_{\text{g}^{+}} - 7^{\delta}_{\text{a}} - 7_{\text{L}}$     | 13.9                       | 9.0                          | 3321                                        | 3398                     | 3457              | 3522                      | 19                       | 38                    | 17                       | 39                    |  |
| $5_{\text{g}^{+}} - 7^{\delta}_{\text{g}^{-}} - 7_{\text{D}}$ | 6.6                        | 7.6                          | 3322                                        | 3361                     | 3451              | 3525                      | 21                       | 37                    | <b>7</b>                 | <b>18</b>             |  |
|                                                               |                            |                              |                                             |                          |                   |                           |                          |                       |                          |                       |  |
| $5_{\text{a}} - 7^{\delta}_{\text{g}^{+}} - 7_{\text{L}}$     | 9.7                        | 8.7                          | 3291                                        | 3376                     | 3460              | 3527                      | 28                       | 68                    | 22                       | 49                    |  |
| $5_{\text{a}} - 7^{\delta}_{\text{g}^{-}} - 7_{\text{L}}$     | 12.1                       | 9.8                          | 3274                                        | 3379                     | 3454              | 3517                      | 28                       | 85                    | 23                       | 66                    |  |
| $5_{\text{a}} - 7^{\delta}_{\text{a}} - 7_{\text{L}}$         | 13.2                       | 10.1                         | 3248                                        | 3397                     | 3456              | 3522                      | 37                       | 111                   | 35                       | 92                    |  |
| $5_{\text{a}} - 7^{\delta}_{\text{g}^{+}} - \text{f}$         | 16.4                       | 10.7                         | 3330                                        | 3431                     | 3435              | 3546                      | 46                       | 80                    | 31                       | 72                    |  |
| $5_{\text{a}} - 7^{\delta}_{\text{g}^{-}} - 7_{\text{D}}$     | 11.7                       | 6.4                          | 3271                                        | 3361                     | 3450              | 3524                      | 33                       | 88                    | 19                       | 69                    |  |
|                                                               |                            |                              |                                             |                          |                   |                           |                          |                       |                          |                       |  |
| $5_{\text{g}^{+}} - 7\delta/5_{\text{a}} - \pi$               | 11.7                       | 6.4                          | 3351                                        | 3426                     | 3444              | 3540                      | 19                       | 45                    | 27                       | 66                    |  |
| $5_{\text{a}} - 7\delta/5_{\text{a}} - \pi$                   | 14.3                       | 9.6                          | 3319                                        | 3425                     | 3442              | 3538                      | 26                       | 44                    | 27                       | 66                    |  |

**Table S3** : Detailed parameters of the NBO(i)→NBO(j) interactions at play in the 7<sup>δ</sup> and 6<sup>δ</sup> NH···Se H-bonds in several conformers of interest of the Ac-Sem-Phe-NH<sub>2</sub> capped dipeptide together with the NH···Se H-bond of the intermolecular *trans*-N-methylacetamide···SeMe<sub>2</sub> complex. Interaction energies E(2) are given in kcal/mol ; NBO occupancy is close to 2 for the donor NBOs considered. Depending on the conformation considered, several donor NBOs to the σ\* NBO of the H-bonded NH have been found : namely the two Se lone pairs NBOs (lp<sub>Se</sub>(1) and lp<sub>Se</sub>(2)), a π orbital of a C-C bond of the ring (π<sub>CC Phe</sub>) as well as the two lone pairs NBOs (lp<sub>OPhe</sub>(1) and lp<sub>OPhe</sub>(2)) of the neighbouring carbonyl O atom of the Phe residue in extended conformations

| Se-compounds                                                       |            |                       |                                                                                                                  |                      |                     |                        |                        |                  |                  |                                 |                  |
|--------------------------------------------------------------------|------------|-----------------------|------------------------------------------------------------------------------------------------------------------|----------------------|---------------------|------------------------|------------------------|------------------|------------------|---------------------------------|------------------|
|                                                                    |            |                       |                                                                                                                  |                      |                     |                        |                        |                  |                  |                                 |                  |
|                                                                    | Side chain | NH···Se distance (pm) | E(2) NBO stabilization energies (kcal/mol) for interaction from a donor NBO to the acceptor σ* <sub>NH</sub> NBO |                      |                     |                        |                        |                  |                  |                                 |                  |
| <b>Ac-Sem-Phe-NH<sub>2</sub></b>                                   |            |                       | donors                                                                                                           |                      |                     |                        |                        |                  |                  |                                 |                  |
| conformation                                                       |            |                       | lp <sub>Se</sub> (1)                                                                                             | lp <sub>Se</sub> (2) | π <sub>CC Phe</sub> | lp <sub>OPhe</sub> (1) | lp <sub>OPhe</sub> (2) | ΣE <sub>HB</sub> | ΣE <sub>NH</sub> | σ* <sub>NH</sub> population (e) | Calc'd frequency |
| <b>5<sub>a</sub> - 7<sup>δ</sup><sub>g+</sub> - 7<sub>L</sub></b>  | ag+a       | 249.5                 | 0.83                                                                                                             | 12.39                |                     |                        |                        | 13.22            | 13.22            | 0.0684                          | <b>3274</b>      |
| <b>5<sub>a</sub> - 7<sup>δ</sup><sub>g-</sub> - 7<sub>L</sub></b>  | ag+a       | 259.2                 | 0.83                                                                                                             | 9.28                 | 1.27                |                        |                        | 10.11            | 11.38            | 0.0631                          | <b>3291</b>      |
| <b>5<sub>g+</sub> - 7<sup>δ</sup>/5<sub>a</sub> - π</b>            | ag+a       | 271.4                 | 0.26                                                                                                             | 4.72                 |                     | 0.19                   | 0.59                   | 4.98             | 5.17             | 0.0497                          | <b>3325</b>      |
| <b>6<sup>δ</sup><sub>a</sub> - π<sub>g+</sub> - 10</b>             | g+g-a      | 250.7                 | 1.38                                                                                                             | 7.47                 |                     |                        |                        | 8.85             | 8.85             | 0.053                           | <b>3360</b>      |
|                                                                    |            |                       |                                                                                                                  |                      |                     |                        |                        |                  |                  |                                 |                  |
| <b>5<sub>g+</sub> - 7<sup>δ</sup><sub>g-</sub> - 7<sub>L</sub></b> | ag+g+      | 262.6                 | 0.96                                                                                                             | 6.3                  |                     |                        |                        | 7.26             | 7.26             | 0.0558                          | <b>3332</b>      |
| <b>5<sub>g+</sub> - 7<sup>δ</sup><sub>g+</sub> - 7<sub>L</sub></b> | ag+g+      | 267.9                 | 1.02                                                                                                             | 5.5                  | 1.37                |                        |                        | 6.52             | 7.89             | 0.0583                          | <b>3314</b>      |
| <b>5<sub>g+</sub> - 7<sup>δ</sup>/5<sub>a</sub> - π</b>            | ag+g+      | 276.1                 | 0.56                                                                                                             | 2.66                 |                     | 0.29                   | 0.98                   | 3.22             | 4.49             | 0.0464                          | <b>3357</b>      |
| <b>6<sup>δ</sup><sub>g-</sub> - π<sub>g+</sub> - 10</b>            | g+g-g-     | 248.5                 | 1.14                                                                                                             | 10.29                |                     |                        |                        | 11.43            | 11.43            | 0.0567                          | <b>3341</b>      |
|                                                                    |            |                       |                                                                                                                  |                      |                     |                        |                        |                  |                  |                                 |                  |
| <b>t-MMA···SeMe<sub>2</sub></b>                                    |            |                       |                                                                                                                  |                      |                     |                        |                        |                  |                  |                                 |                  |
| <b>6<sup>δ</sup><sub>a</sub> - π<sub>g+</sub> - 10</b>             |            | 261.4                 | 0.43                                                                                                             | 7.24                 |                     |                        |                        | 7.67             | 7.67             | 0.0515                          | <b>3355</b>      |

**Table S4** : Detailed parameters of the NBO(i)→NBO(j) interactions at play in the 7<sup>δ</sup> and 6<sup>δ</sup> NH···Se H-bonds in several conformers of interest of the Ac-Met-Phe-NH<sub>2</sub> capped dipeptide together with the NH···Se H-bond of the intermolecular *trans*-N-methylacetamide···SMe<sub>2</sub> complex. Interaction energies E(2) are given in kcal/mol ; NBO occupancy is close to 2 for the donor NBOs considered. Depending on the conformation considered, several donor NBOs to the σ\* NBO of the H-bonded NH have been found : namely the two S lone pairs NBOs (lp<sub>S</sub>(1) and lp<sub>S</sub>(2)), a π orbital of a C-C bond of the ring (π<sub>CC Phe</sub>) as well as the two lone pairs NBOs (lp<sub>OPhe</sub>(1) and lp<sub>OPhe</sub>(2)) of the neighbouring carbonyl O atom of the Phe residue in extended conformations

|                                                                      |            |                      |                                                                                                                  |                      |                     |                        |                        |                  |                  |                             |                  |
|----------------------------------------------------------------------|------------|----------------------|------------------------------------------------------------------------------------------------------------------|----------------------|---------------------|------------------------|------------------------|------------------|------------------|-----------------------------|------------------|
| S-compounds                                                          |            |                      |                                                                                                                  |                      |                     |                        |                        |                  |                  |                             |                  |
|                                                                      |            |                      |                                                                                                                  |                      |                     |                        |                        |                  |                  |                             |                  |
|                                                                      | Side chain | NH···S distance (pm) | E(2) NBO stabilization energies (kcal/mol) for interaction from a donor NBO to the acceptor σ* <sub>NH</sub> NBO |                      |                     |                        |                        |                  |                  |                             |                  |
| <b>Ac-Met-Phe-NH<sub>2</sub></b>                                     |            |                      | donors                                                                                                           |                      |                     |                        |                        |                  |                  |                             |                  |
| conformation                                                         |            |                      | lp <sub>Se</sub> (1)                                                                                             | lp <sub>Se</sub> (2) | π <sub>CC Phe</sub> | lp <sub>OPhe</sub> (1) | lp <sub>OPhe</sub> (2) | ΣE <sub>NH</sub> | ΣE <sub>HB</sub> | σ* <sub>NH</sub> population | Calc'd frequency |
| <b>5<sub>a</sub> - 7<sup>δ</sup><sub>g+</sub> - 7<sub>L</sub></b>    | ag+a       | 238.4                | 1.08                                                                                                             | 11.21                |                     |                        |                        | 12.29            | 12.29            | 0.0684                      | <b>3274</b>      |
| <b>5<sub>a</sub> - 7<sup>δ</sup><sub>g-</sub> - 7<sub>L</sub></b>    | ag+a       | 248.9                | 0.98                                                                                                             | 7.82                 | 1.26                |                        |                        | 8.8              | 10.06            | 0.0631                      | <b>3291</b>      |
| <b>5<sub>g+</sub> - 7<sup>δ</sup><sub>g+</sub>/5<sub>a</sub> - π</b> | ag+a       | 261.1                | 0.36                                                                                                             | 4.07                 |                     | 0.23                   | 0.74                   | 4.43             | 5.4              | 0.0497                      | <b>3325</b>      |
| <b>6<sup>δ</sup><sub>a</sub> - π<sub>g+</sub> - 10</b>               | g+g-a      | 238.8                | 1.98                                                                                                             | 6.42                 |                     |                        |                        | 8.4              | 8.4              | 0.053                       | <b>3360</b>      |
|                                                                      |            |                      |                                                                                                                  |                      |                     |                        |                        |                  |                  |                             |                  |
| <b>5<sub>g+</sub> - 7<sup>δ</sup><sub>g-</sub> - 7<sub>L</sub></b>   | ag+g+      | 248.9                | 1.46                                                                                                             | 5.86                 |                     |                        |                        | 7.32             | 7.32             | 0.0558                      | <b>3332</b>      |
| <b>5<sub>g+</sub> - 7<sup>δ</sup><sub>g+</sub> - 7<sub>L</sub></b>   | ag+g+      | 253.7                | 1.53                                                                                                             | 5.4                  | 1.49                |                        |                        | 6.93             | 8.42             | 0.0583                      | <b>3314</b>      |
| <b>5<sub>g+</sub> - 7<sup>δ</sup><sub>g+</sub>/5<sub>a</sub> - π</b> | ag+g+      | 262.8                | 0.78                                                                                                             | 2.44                 |                     | 0.22                   | 0.77                   | 3.22             | 4.21             | 0.0464                      | <b>3357</b>      |
| <b>6<sup>δ</sup><sub>g-</sub> - π<sub>g+</sub> - 10</b>              | g+g-g-     | 239.5                | 1.31                                                                                                             | 8.68                 |                     |                        |                        | 9.99             | 9.99             | 0.0567                      | <b>3341</b>      |
|                                                                      |            |                      |                                                                                                                  |                      |                     |                        |                        |                  |                  |                             |                  |
| <b>t-MMA···SMe<sub>2</sub></b>                                       |            |                      |                                                                                                                  |                      |                     |                        |                        |                  |                  |                             |                  |
| <b>6<sup>δ</sup><sub>a</sub> - π<sub>g+</sub> - 10</b>               |            | 246.8                | 0.71                                                                                                             | 7.55                 |                     |                        |                        | 8.26             | 8.26             | 0.0519                      | <b>3345</b>      |

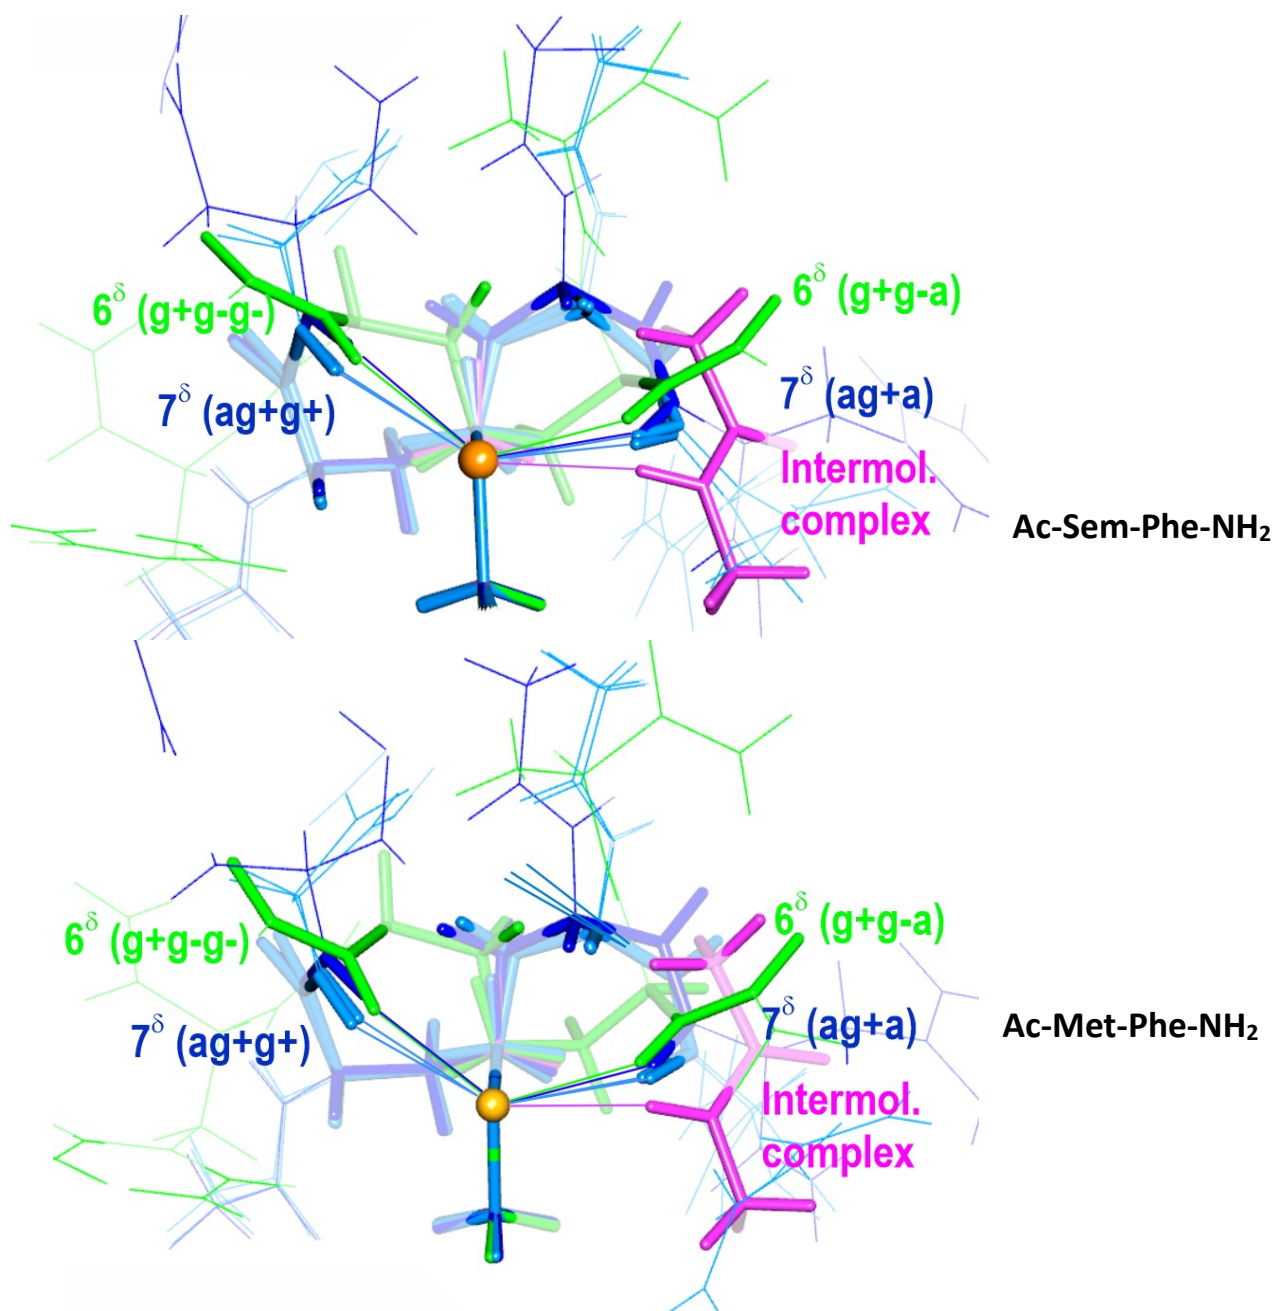

**Figure S1** : Comparison of the NH $\cdots$ S/Se approaches of the relevant conformations (5-7 $^{\delta}_{g+/g-}$ -7L light blue, 5-7 $^{\delta}_{5a-\pi}$  dark blue and 6 $^{\delta}$ - $\pi_{g+}$ -10 green) of the Ac-Sem-Phe-NH<sub>2</sub> (*top panel*) and Ac-Met-Phe-NH<sub>2</sub> (*bottom panel*) compounds, as found at the DFT-D level of theory. The terminal part of all the Sem/Met side chains have been overlaid (Se/S atom in yellow), allowing to distinguish the effect of the  $\chi_3$  dihedral orientation (side chain dihedrals between parentheses). For the sake of clarity, front atoms have been omitted and background atoms shaded. For reference, the structure of the intermolecular complex has also been added.

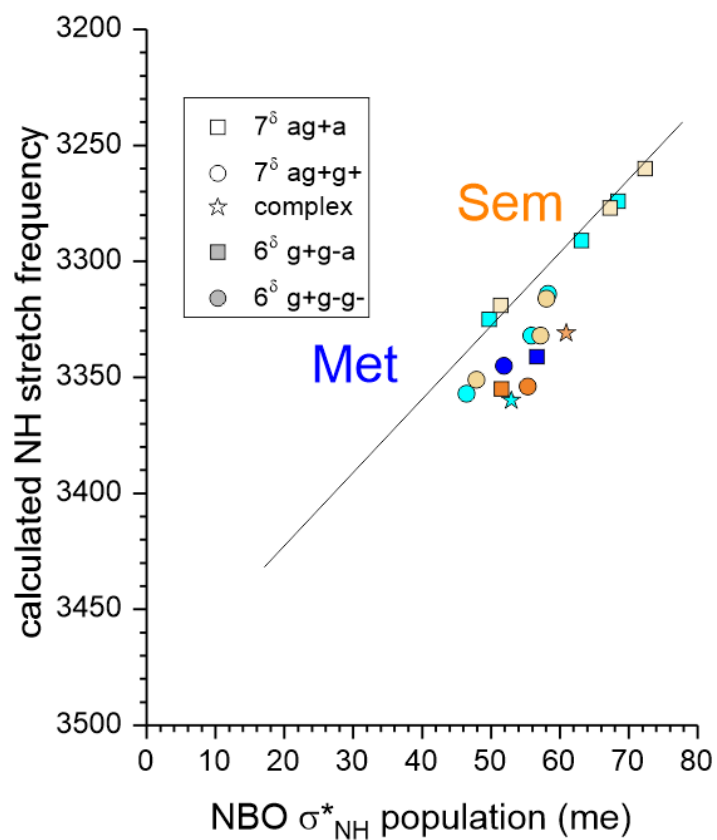

**Figure S2 :** Calculated NH stretch frequency (scaled harmonic frequencies) vs. the total stabilization energy (noted  $\Sigma E_{\text{NH}}$ ), taking into account all the interactions that contribute to the electron delocalization towards the  $\sigma^*_{\text{NH}}$  interaction, for NH groups involved in a  $\text{NH}\cdots\text{S}$  interaction, for all the conformations considered in the present analysis.
